# Supplementary material for: Isotope geochemistry, hydrochemistry, and mineralogy of a river affected by acid mine drainage in a mining area, South China
Source: Royal Society of Chemistry journal article supplement (doi:10.1039/c7ra07809a), 2017-01-01
Supplement: c7ra07809a1.pdf [file c7ra07809a1.pdf]

**Electronic Supplementary Information(ESI):**

**Isotope geochemistry, hydrochemistry, mineralogy of the  
river affected by acid mine drainage in mining area, South  
China**

Di Xia<sup>1</sup>, Han Ye<sup>1</sup>, Yingying Xie<sup>1</sup>, Chengfang Yang<sup>1</sup>,Meiqin Chen<sup>2</sup>

Zhi Dang<sup>1,3</sup>, Xiaoyun Yi<sup>1,3</sup>, Guining Lu<sup>1,4\*</sup>

1. School of Environment and Energy, South China University of Technology,  
Guangzhou 510006, China
2. School of Environmental and Biological Engineering, Guangdong University of  
Petrochemical Technology, Maoming 525000, PR China
3. The Key Laboratory of Pollution Control and Ecosystem Restoration in Industry  
Clusters, Ministry of Education, South China University of Technology,  
Guangzhou 510006, China
4. Guangdong Provincial Engineering and Technology Research Center for  
Environmental Risk Prevention and Emergency Disposal, South China University  
of Technology, Guangzhou 510006, China

\* Corresponding author, E-mail: GNLu@foxmail.com

**List of Contents:**

1. Table S1: Aqueous parameters (pH, ORP and DO) in the Hengshi River in Jan/Aug/Nov 2016.
2. Table S2: Concentrations of  $\text{SO}_4^{2-}$  in the Hengshi River in Jan/Aug/Nov 2016.
3. Table S3: Concentrations of total Fe and  $\text{Fe}^{2+}$  in the Hengshi River in Jan/Aug/Nov 2016.
4. Table S4: Concentrations of  $\text{Cu}^{2+}$  and  $\text{Zn}^{2+}$  in the Hengshi River in Jan/Aug/Nov 2016.
5. Table S5: Concentrations of  $\text{Ca}^{2+}$  and  $\text{Mg}^{2+}$  in the Hengshi River in Jan/Aug/Nov 2016.
6. Table S6: Concentration distributions of organic matter (OM), Water soluble sulfate (WS) and exchangeable sulfate (ExS) in sediment samples along the Hengshi River.
7. Table S7: Variations of  $\delta^{34}\text{S}$  and  $\delta^{18}\text{O}$  of dissolved  $\text{SO}_4^{2-}$  along the Hengshi River
8. Table S8: Aqueous parameters (pH, ORP and DO) in the Hengshi River in the previous paper. (Chemosphere 2015, 119, 734-743)

Table S1: Aqueous parameters (pH; ORP and DO) in the Hengshi River in Jan/Aug/Nov 2016.

| Sampling | pH     |        |         | ORP    |         | DO     |         |
|----------|--------|--------|---------|--------|---------|--------|---------|
|          | 2016.1 | 2016.8 | 2016.11 | 2016.1 | 2016.11 | 2011.8 | 2011.11 |
| S0       | 2.67   | 2.63   | 2.98    | 442    | 332     | 5.7    | 7.2     |
| S1       | 2.7    | 2.77   | 3.07    | 450    | 330     | 4.3    | 4.2     |
| S3       | 2.98   | 9.38   | 6.95    | 420    | 101     | 6.6    | 7.3     |
| C1       | 6.72   | 7.25   | 7.04    | 274    | 91      | 6.8    | 1.7     |
| S4       | 3.22   | 8.94   | 10.3    | 418    | -86     | 6.5    | 7.3     |
| S5       | 3      | 8.9    | 9.33    | 432    | -34     | 5.8    | 7.6     |
| C2       | /      | 5.75   | 8.76    | /      | 5       | 6.4    | 7.9     |
| S6       | 3.79   | 5.86   | 9.03    | 392    | -12     | 6.2    | 8.3     |
| S7       | 3.27   | 5.88   | 8.12    | 414    | 32      | 5.2    | 8       |
| TP       | 7.01   | 7.25   | 7.49    | 253    | 69      | 6.5    | 6.4     |
| S8       | 4.7    | 6.99   | 7.82    | 293    | 53      | 5.8    | 7.2     |
| S9       | 6.4    | 7.12   | 7.76    | 229    | 55      | 6.4    | 7.4     |
| S10      | 6.77   | 6.82   | 7.61    | 203    | 63      | 6.1    | 7.7     |
| C3       | 7.18   | 7.14   | 7.59    | 204    | 67      | 4.9    | 4.5     |
| S11      | 6.91   | 6.96   | 7.55    | 192    | 67      | 3.5    | 4.4     |

Table S2: Concentrations of  $\text{SO}_4^{2-}$  in the Hengshi River in Jan/Aug/Nov 2016.

| Sampling | $\text{SO}_4^{2-}$ (mg/L) |                |                 |
|----------|---------------------------|----------------|-----------------|
|          | 2016.1                    | 2016.8         | 2016.11         |
| S0       | 4837.84                   | 4008.04±94.73  | 4392.20 ±66.74  |
| S1       | 4008.76                   | 5717.88 ±87.05 | 6745.64 ±262.52 |
| S3       | 3011.17                   | 1823.26 ±33.38 | 2809.61 ±106.79 |
| C1       | 5.22                      | 4.56 ±0.16     | 4.66 ±0.93      |
| S4       | 2114.55                   | 107.12 ±28.15  | 1776.07 ±26.70  |
| S5       | 1934.41                   | /              | 1760.34 ±13.35  |
| C2       | 324.88                    | 230.34±1.84    | 314.47 ±15.57   |
| S6       | 511.50                    | 280.37 ±11.84  | 389.19 ±0.89    |
| S7       | 770.47                    | 472.27 ±6.31   | 620.13 ±16.91   |
| TP       | 14.80                     | 14.43 ±0.54    | 26.84 ±0.36     |
| S8       | 255.55                    | 162.33 ±4.30   | 360.25 ±0.89    |
| S9       | 129.69                    | 96.27 ±1.95    | 147.56 ±5.34    |
| S10      | 103.74                    | 104.50 ±1.22   | 78.66 ±0.67     |
| C3       | 23.43                     | 24.29 ±7.02    | 30.05 ±0.62     |
| S11      | 54.23                     | 56.82 ±1.37    | 9.38 ±0.40      |

Table S3: Concentrations of total Fe and Fe<sup>2+</sup> in the Hengshi River in Jan/Aug/Nov 2016.

| Sampling | Total Fe(mg/L) |              |             | Fe <sup>2+</sup> (mg/L) |              |
|----------|----------------|--------------|-------------|-------------------------|--------------|
|          | 2016.1         | 2016.8       | 2016.11     | 2016.8                  | 2016.11      |
| S0       | 646.78         | 347.78       | 495.07±10.8 | 49.56±3.70              | 7.01±0.43    |
| S1       | 347.31         | 400.48±23.93 | 646.13±5.57 | 356.92±4.05             | 488.11±14.23 |
| S3       | 176.72         | 0.21±0.01    | 0.22±0.06   | 0.35±0.07               | 0.07±0.04    |
| C1       | 0.00           | 0.05±0.03    | 0.11±0.05   | 0.04±0.03               | 0.15±0.07    |
| S4       | 57.06          | 0.14±0.02    | 0.15±0.01   | 0.07±0.01               | 0.04±0.01    |
| S5       | 74.44          | /            | 0.14±0.07   | /                       | 0.04±0.01    |
| C2       | 0.42           | 0.25±0.01    | 0.15±0.02   | 7.05±0.54               | 0.21±0.06    |
| S6       | 0.90           | 0.34±0.01    | 0.31±0.19   | 4.63±0.67               | 0.09±0.04    |
| S7       | 12.08          | 0.16±0.01    | 0.16±0.02   | 2.25±0.03               | 0.14±0.01    |
| TP       | 0.00           | 0.08±0.02    | 0.10±0.02   | 0                       | 0.12±0.01    |
| S8       | 0.24           | 0.16±0.04    | 0.10±0.02   | 0.03±0.02               | 0.045±0.01   |
| S9       | 0.00           | 0.05±0.05    | 0.16±0.11   | 0.02±0.01               | 0.08±0.07    |
| S10      | 0.00           | 0.09±0.04    | 0.13±0.08   | 0.032±0.17              | 0.09±0.03    |
| C3       | 0.00           | 0.11±0.03    | 0.12±0.04   | 0.04±0.01               | 0.04±0.01    |
| S11      | 0.00           | 0.09±0.01    | 0.22±0.12   | 0.02±0.01               | 0.09±0.03    |

Table S4: Concentrations of Cu<sup>2+</sup> and Zn<sup>2+</sup> in the Hengshi River in Jan/Aug/Nov 2016.

| Sampling | Cu <sup>2+</sup> (mg/L) |             |             | Zn <sup>2+</sup> (mg/L) |              |              |
|----------|-------------------------|-------------|-------------|-------------------------|--------------|--------------|
|          | 2016.1                  | 2016.8      | 2016.11     | 2016.1                  | 2016.8       | 2016.11      |
| S0       | 45.20                   | 17.18 ±0.41 | 35.06 ±3.64 | 128.87                  | 122.91 ±4.15 | 96.48±2.00   |
| S1       | 11.89                   | 4.42 ±0.02  | 9.22 ±0.12  | 94.65                   | 128.56 ±3.17 | 116.82 ±1.52 |
| S3       | 5.59                    | 0.02 ±0.001 | 0.05 ±0.02  | 63.67                   | 0.36 ±0.01   | 0.13 ±0.05   |
| C1       | 0.03                    | 0.01±0.001  | 0.01 ±0.004 | 0.00                    | 0.01 ±0.002  | 0.02 ±0.01   |
| S4       | 3.81                    | 0.03 ±0.001 | 0.02 ±0.002 | 41.54                   | 0.27 ±0.004  | 0.14 ±0.03   |
| S5       | 4.26                    | /           | 0.02 ±0.001 | 46.92                   | /            | 0.13 ±0.11   |
| C2       | 0.88                    | 0.56 ±0.001 | 0.02 ±0.004 | 1.46                    | 0.77±0.01    | 0.64 ±0.29   |
| S6       | 0.93                    | 0.38 ±0.001 | 0.03 ±0.001 | 2.52                    | 0.75 ±0.003  | 0.24 ±0.01   |
| S7       | 1.61                    | 0.34 ±0.001 | 0.02 ±0.001 | 11.52                   | 1.20 ±0.003  | 0.29 ±0.001  |
| TP       | 0.04                    | 0.01 ±0.001 | 0.01 ±0.002 | 0.00                    | 0.01 ±0.001  | 0.03 ±0.03   |
| S8       | 0.76                    | 0.02 ±0.001 | 0.01 ±0.001 | 4.50                    | 0.23 ±0.006  | 0.13 ±0.001  |
| S9       | 0.04                    | 0.01 ±0.001 | 0.01 ±0.001 | 1.45                    | 0.09 ±0.003  | 0.10 ±0.06   |
| S10      | 0.04                    | 0.02 ±0.001 | 0.01 ±0.004 | 1.19                    | 0.28 ±0.003  | 0.07 ±0.001  |
| C3       | 0.04                    | 0.01 ±0.001 | 0.01 ±0.004 | 0.00                    | 0.01 ±0.004  | 0.05 ±0.01   |
| S11      | 0.04                    | 0.01 ±0.001 | 0.01 ±0.002 | 0.58                    | 0.10 ±0.003  | 0.16 ±0.11   |

Table S5: Concentrations of Ca<sup>2+</sup> and Mg<sup>2+</sup> in the Hengshi River in Jan/Aug/Nov 2016.

| Sampling   | Ca <sup>2+</sup> (mg/L) |               |               | Mg <sup>2+</sup> (mg/L) |              |               |
|------------|-------------------------|---------------|---------------|-------------------------|--------------|---------------|
|            | 2016.1                  | 2016.8        | 2016.11       | 2016.1                  | 2016.8       | 2016.11       |
| <b>S0</b>  | 24.30                   | 68.24 ±1.87   | 68.20 ±10.80  | 182.00                  | 100.68 ±0.60 | 118.59 ±13.17 |
| <b>S1</b>  | 107.40                  | 269.34 ±2.99  | 289.84 ±0.78  | 177.30                  | 207.49 ±4.77 | 230.54 ±3.43  |
| <b>S3</b>  | 261.23                  | 586.08 ±6.34  | 701.71 ±25.60 | 129.92                  | 44.13 ±1.10  | 66.02 ±3.73   |
| <b>C1</b>  | 11.78                   | 10.17 ±0.26   | 14.02 ±0.07   | 1.76                    | 1.55 ±0.02   | 2.13 ±0.02    |
| <b>S4</b>  | 186.91                  | 345.74 ±13.39 | 655.28 ±20.8  | 93.04                   | 26.65 ±0.92  | 27.73 ±0.81   |
| <b>S5</b>  | 212.22                  | /             | 609.95 ±21.30 | 104.15                  | /            | 42.91 ±2.16   |
| <b>C2</b>  | 65.70                   | 39.95 ±0.84   | 69.22 ±0.81   | 19.87                   | 8.45 ±0.13   | 9.56 ±0.06    |
| <b>S6</b>  | 65.20                   | 71.56 ±1.00   | 77.28 ±0.51   | 20.22                   | 10.49 ±0.06  | 9.94 ±0.23    |
| <b>S7</b>  | 85.86                   | 136.68 ±4.00  | 145.67 ±1.46  | 19.08                   | 15.62 ±0.22  | 16.18 ±0.10   |
| <b>TP</b>  | 14.00                   | 17.90 ±0.32   | 24.92 ±0.27   | 1.29                    | 1.53 ±0.07   | 1.94 ±0.01    |
| <b>S8</b>  | 43.57                   | 61.00 ±0.72   | 102.71 ±11.65 | 14.83                   | 6.55 ±0.09   | 11.18 ±0.41   |
| <b>S9</b>  | 36.34                   | 42.48 ±0.27   | 57.48 ±1.68   | 7.90                    | 4.75 ±0.20   | 4.59 ±0.07    |
| <b>S10</b> | 43.44                   | 46.65 ±3.86   | 49.31 ±0.34   | 7.12                    | 5.03 ±0.18   | 3.99 ±0.003   |
| <b>C3</b>  | 28.92                   | 21.96 ±0.25   | 29.87 ±1.02   | 2.43                    | 2.10 ±0.05   | 2.49 ±0.06    |
| <b>S11</b> | 30.27                   | 28.98 ±0.81   | 34.19 ±0.28   | 4.14                    | 3.09 ±0.04   | 3.11 ±0.03    |

Table S6: Concentration distributions of organic matter (OM), Water soluble sulfate (WS) and exchangeable sulfate (ExS) in sediment samples along the Hengshi River.

| Sampling   | Organic Matter (%) |            | Water soluble sulfate (mg/g) |             | Exchangeable sulfate(mg/g) |             |
|------------|--------------------|------------|------------------------------|-------------|----------------------------|-------------|
|            | 2016.8             | 2016.11    | 2016.8                       | 2016.11     | 2016.8                     | 2016.11     |
| <b>S0</b>  | 1.82 ±0.16         | 0.59 ±0.03 | 3.61 ±0.19                   | 2.18 ±0.03  | 2.56 ±0.34                 | 2.62 ±0.21  |
| <b>S1</b>  | 1.98 ±0.60         | 0.86 ±0.21 | 1.52 ±0.2                    | 2.03 ±0.01  | 2.99 ±0.02                 | 3.77 ±0.04  |
| <b>S3</b>  | 1.96 ±0.26         | 0.72 ±0.04 | 5.08 ±0.22                   | 6.13 ±0.24  | 10.36 ±0.41                | 10.44 ±0.07 |
| <b>C1</b>  | 3.26 ±67           | 2.24 ±0.06 | 0.04 ±0.01                   | 0.09 ±0.01  | 0.02 ±0.00                 | 0.06 ±0.00  |
| <b>S4</b>  | 2.53 ±0.11         | 0.87 ±0.04 | 3.00 ±0.12                   | 11.49 ±0.38 | 6.63 ±0.21                 | 15.96 ±0.31 |
| <b>S5</b>  | /                  | 0.96 ±0.11 | /                            | 3.83 ±0.21  | /                          | 6.96 ±0.29  |
| <b>C2</b>  | /                  | 2.02 ±0.03 | /                            | 1.19 ±0.01  | /                          | 5.41 ±0.11  |
| <b>S6</b>  | 3.10 ±0.15         | 2.17 ±0.19 | 1.89 ±0.09                   | 3.72 ±0.02  | 10.82 ±0.51                | 4.15 ±0.01  |
| <b>S7</b>  | 2.53 ±0.24         | 2.17 ±0.03 | 2.85 ±0.07                   | 2.54 ±0.05  | 12.93 ±0.81                | 3.69 ±0.01  |
| <b>TP</b>  | 3.00 ±0.10         | 5.14 ±0.63 | 0.11 ±0.01                   | 0.28 ±0.01  | 0.07 ±0.00                 | 0.23 ±0.00  |
| <b>S8</b>  | 6.29 ±0.04         | 1.97 ±0.11 | 1.28 ±0.01                   | 1.87 ±0.05  | 3.12 ±0.02                 | 2.80 ±0.02  |
| <b>S9</b>  | 3.77 ±0.39         | 2.57 ±0.13 | 1.39 ±0.03                   | 0.95 ±0.01  | 1.27 ±0.01                 | 1.17 ±0.01  |
| <b>S10</b> | 2.41 ±0.22         | 2.80 ±0.10 | 1.01 ±0.01                   | 0.52 ±0.01  | 1.27 ±0.10                 | 1.16 ±0.01  |
| <b>C3</b>  | 2.97 ±0.60         | 3.09 ±0.23 | 0.14 ±0.01                   | 0.09 ±0.02  | 0.18 ±0.01                 | 0.18 ±0.01  |
| <b>S11</b> | 3.24 ±0.66         | 1.95 ±0.19 | 0.60 ±0.01                   | 0.26 ±0.01  | 0.56 ±0.00                 | 0.62 ±0.02  |

Table S7: Variations of  $\delta^{34}\text{S}$  and  $\delta^{18}\text{O}$  of dissolved  $\text{SO}_4^{2-}$  along the Hengshi River

| Sampling                       | $\delta^{34}\text{S}(\text{‰}; \text{VCDT})$ |             |             | $\delta^{18}\text{O}(\text{‰}; \text{SMOW})$ |
|--------------------------------|----------------------------------------------|-------------|-------------|----------------------------------------------|
|                                | 2016.1                                       | 2016.8      | 2016.11     | 2016.1                                       |
| <b>S0</b>                      | -1.53                                        | -1.75 ±0.05 | -1.67 ±0.01 | -3.18                                        |
| <b>S1</b>                      | -1.23                                        | -1.17 ±0.01 | -1.10 ±0.05 | -2.66                                        |
| <b>S3</b>                      | -1.19                                        | -1.17 ±0.01 | -1.39 ±0.04 | -2.48                                        |
| <b>C1</b>                      | /                                            | 2.92 ±0.01  | 4.02 ±0.03  | /                                            |
| <b>S4</b>                      | -1.19                                        | -1.10 ±0.01 | -1.26 ±0.01 | -2.61                                        |
| <b>S5</b>                      | -1.16                                        | /           | -1.30 ±0.04 | -2.54                                        |
| <b>C2</b>                      | -0.44                                        | -0.71 ±0.02 | -0.56 ±0.02 | -3.97                                        |
| <b>S6</b>                      | -0.45                                        | -0.87 ±0.08 | -0.50 ±0.01 | -2.85                                        |
| <b>S7</b>                      | -0.88                                        | -1.03 ±0.01 | -0.91 ±0.1  | -2.68                                        |
| <b>TP</b>                      | /                                            | 3.54 ±0.04  | 3.61 ±0.01  | /                                            |
| <b>S8</b>                      | -0.75                                        | -0.82 ±0.07 | -0.97 ±0.02 | -2.59                                        |
| <b>S9</b>                      | 0.02                                         | 0.15 ±0.02  | -0.34 ±0.03 | -0.33                                        |
| <b>S10</b>                     | 0.21                                         | 0.16 ±0.01  | 0.65 ±0.001 | 0.16                                         |
| <b>C3</b>                      | -0.32                                        | 4.07 ±0.09  | 4.86 ±0.01  | -2.76                                        |
| <b>S11</b>                     | 1.99                                         | 2.61 ±0.09  | 2.92 ±0.01  | 4.31                                         |
| <b>The tailing impoundment</b> | -0.23                                        | /           | /           | -3.41                                        |

Table S8: Aqueous parameters (pH; ORP and DO) in the Hengshi River in the previous paper. (Chemosphere 2015, 119, 734-743)

|            | pH     |         | ORP    |         | DO     |         |
|------------|--------|---------|--------|---------|--------|---------|
|            | 2012.7 | 2012.11 | 2012.7 | 2012.11 | 2012.7 | 2012.11 |
| <b>S1</b>  | 2.8    | 2.7     | 583    | 481     | 2.73   | 9.6     |
| <b>S2</b>  | 2.8    | 2.8     | 593    | 564     | 4.53   | 8.75    |
| <b>S3</b>  | 3      | 2.9     | 467    | 568     | 4.62   | 7.6     |
| <b>C1</b>  | 5.8    | 5.8     | /      | /       | 5.47   | 7.76    |
| <b>S4</b>  | 3.1    | 3       | 472    | 583     | 4.9    | 7.8     |
| <b>S5</b>  | 3.1    | 3       | 509    | 581     | 5.96   | 8.38    |
| <b>C2</b>  | 4.8    | 4.5     | /      | /       | 6.19   | 7.73    |
| <b>S6</b>  | 3.9    | 3       | 547    | 547     | 5.95   | 8.9     |
| <b>S7</b>  | 4.3    | 4.1     | 453    | 535     | 5.07   | 7       |
| <b>S8</b>  | 4.8    | 5.2     | 433    | 384     | 5.67   | 6.08    |
| <b>S9</b>  | 5.4    | 5.4     | 280    | 230     | 5.94   | 7.44    |
| <b>C3</b>  | 6      | 5.4     | /      | /       | 5.64   | 5.25    |
| <b>S10</b> | 5.4    | 5.5     | 235    | 229     | 4.73   | 9.01    |
| <b>S11</b> | 5.7    | 5.8     | 205    | 225     | 4.02   | 5.85    |
